# Supplementary material
Source: PubMed Central journal article supplement (PMC7981263)
Supplement: NIHMS1667692-supplement-1.pdf [file NIHMS1667692-supplement-1.pdf]

## Supplemental Figure Legend

**Fig. S1 ER stress mediates the apoptotic effect of sulindac sulfide in HCT116 cells.** (A) RT-PCR analysis of mRNA expression of indicated genes in HCT116 cells treated with 120  $\mu$ M sulindac sulfide (SUS) for 8 or 24 hr. (B) Representative immunofluorescence staining pictures showing the induction of CHOP and BiP upon treatment of HCT116 cells with 120  $\mu$ M SUS for 24 hr. Scale bars: 10  $\mu$ m. (C) Representative Immuno-TEM pictures showing the surface expression of BiP (gold particles 6 nm) upon SUS treatment as in (B). Scale bars: 400 nm. (D) RT-PCR analysis of *DR5* mRNA expression in HCT116 cells transfected with indicated siRNA and treated with SUS as in (B). (E) Western blotting of indicated proteins in wildtype (WT) and *BID* KO HCT116 cells treated as in (B). (F) Western blotting of indicated proteins in WT and *DR5* KO HCT116 cells treated as in (B). (G) Apoptosis in WT and *DR5* KO HCT116 cells treated with 120  $\mu$ M SUS for 48 hr was analyzed by counting condensed and fragmented nuclei after nuclear staining with Hoechst 33258. Results in (A), (D) and (G) were expressed as means + SD of three independent experiments. \* $P < 0.05$ ; \*\*\* $P < 0.001$ .

**Fig. S2 ER stress mediates the apoptotic effect of sulindac sulfide and indomethacin in RKO and HT29 cells.** (A) Western blotting of indicated proteins in RKO and HT29 cells treated with 200  $\mu$ M sulindac sulfide (SUS) for 24 hr. \*, non-specific bands. (B) Western blotting of indicated proteins in RKO and HT29 cells transfected with control scrambled or *ATF4* siRNA were treated with SUS as in (A). (C) Western blotting of indicated proteins in RKO and HT29 cells transfected with control scrambled or *CHOP* siRNA were treated with SUS as in (A). (D) Apoptosis in cells transfected and treated as in (B) and (C) was analyzed by counting condensed and fragmented nuclei after nuclear staining with Hoechst 33258. (E) Western blotting of indicated proteins in WT and *DR5* KO RKO cells treated as in (A). (F)

Apoptosis in WT and *DR5* KO RKO cells treated as in (A) was analyzed as in (D). **(G)** Western blotting of indicated proteins in RKO and HT29 cells treated with 500  $\mu$ M indomethacin (Indo) for 24 hr. Results in (D) and (F) were expressed as means + SD of three independent experiments. \*\*P < 0.01; \*\*\*P < 0.001.

**Fig. S3 Analysis of immunogenic cell death in colon cancer cells treated with sulindac**

**sulfide.** **(A)** RKO cells pretreated with Salubrinal (1.0  $\mu$ M) for 1.5 hr were treated with 200  $\mu$ M sulindac sulfide (SUS) for 12 hr. CRT translocation was examined by immunostaining followed by flow cytometry. Means + SD are shown. \*\*P < 0.01. **(B), (C)** HCT116 cells with WT or KO of *BID* or transfection of *CHOP* or *ATF4* siRNA were treated with 120  $\mu$ M sulindac sulfide (SUS) for 12 hr. After treatment, HCT116 cells and dendritic cells prepared from human blood in healthy donors were labelled with red (Far Red) and green (CFSE) fluorescence, respectively, and co-incubated at 1:1 ratio. DC phagocytosis was analyzed by detecting fused cells by fluorescence microscopy and quantified by flow cytometry. **(B)** Representative pictures of fluorescence microscopy showing early and late DC phagocytosis in indicated boxes. Scale bars: 10  $\mu$ m. **(C)** Representative flow cytometry results. Black: HCT116 cells; green: DCs; red: fused HCT116 and phagocytic DC cells. **(D)** Analysis of DC phagocytosis in NCM356 cells transfected with control scrambled or *APC* siRNA and treated with SUS as in (B) and (C).

**Fig. S4 ER stress inhibition and *BID* KO suppresses NSAID-mediated immune cell**

**infiltration.** Ten-week-old *APC*<sup>Min/+</sup> mice with WT or KO of *BID* were treated with sulindac +/- salubrinal as in Fig. 5A. Sections of small intestine were analyzed by immunostaining for indicated immune cell markers. **(A)** Representative pictures of CD3 staining. **(B)** Representative pictures and **(C)** quantification of CD11c staining. Scale bars: 25  $\mu$ m. Results in (C) were expressed as means + SD; n=5. \*\*\*P < 0.001.

**Fig. S5 Lymphocyte infiltration in advanced adenomas from patients treated with NSAIDs.**

Advanced adenomas from 16 patients taking NSAIDs and 14 patients not taking NSAIDs were analyzed for lymphocyte infiltration by CD3 immunostaining. *Left*: representative staining pictures; scale bars: 200  $\mu\text{m}$ . *Right*: mean numbers + SEM of CD3 positivity.

Figure S1

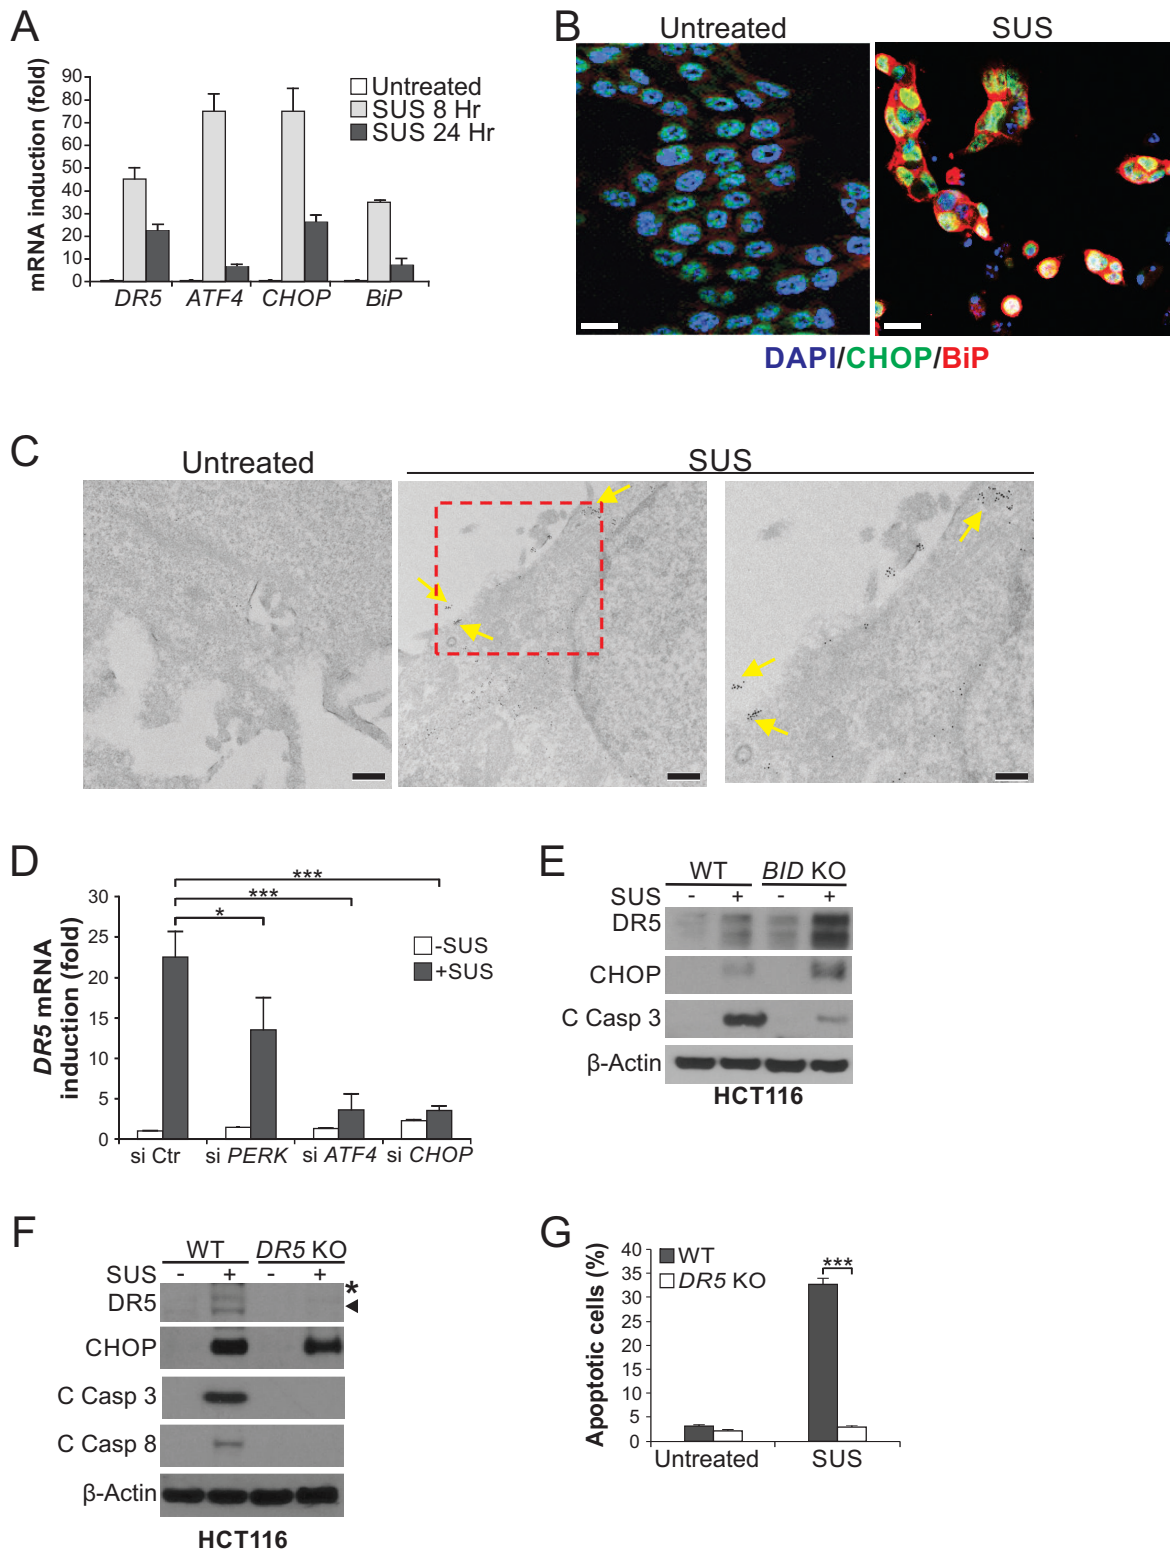

Figure S2

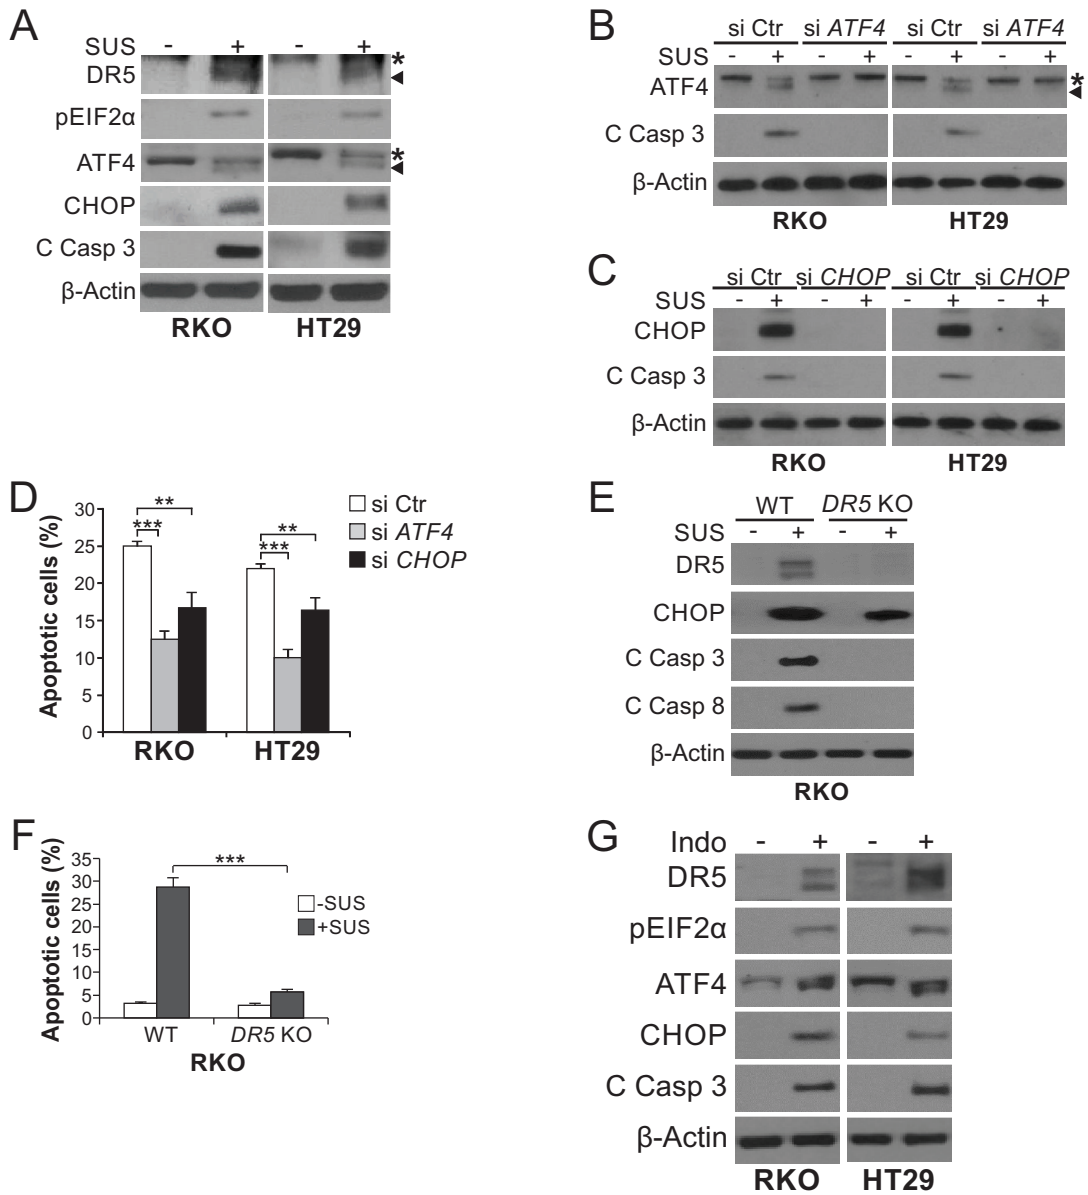

Figure S3

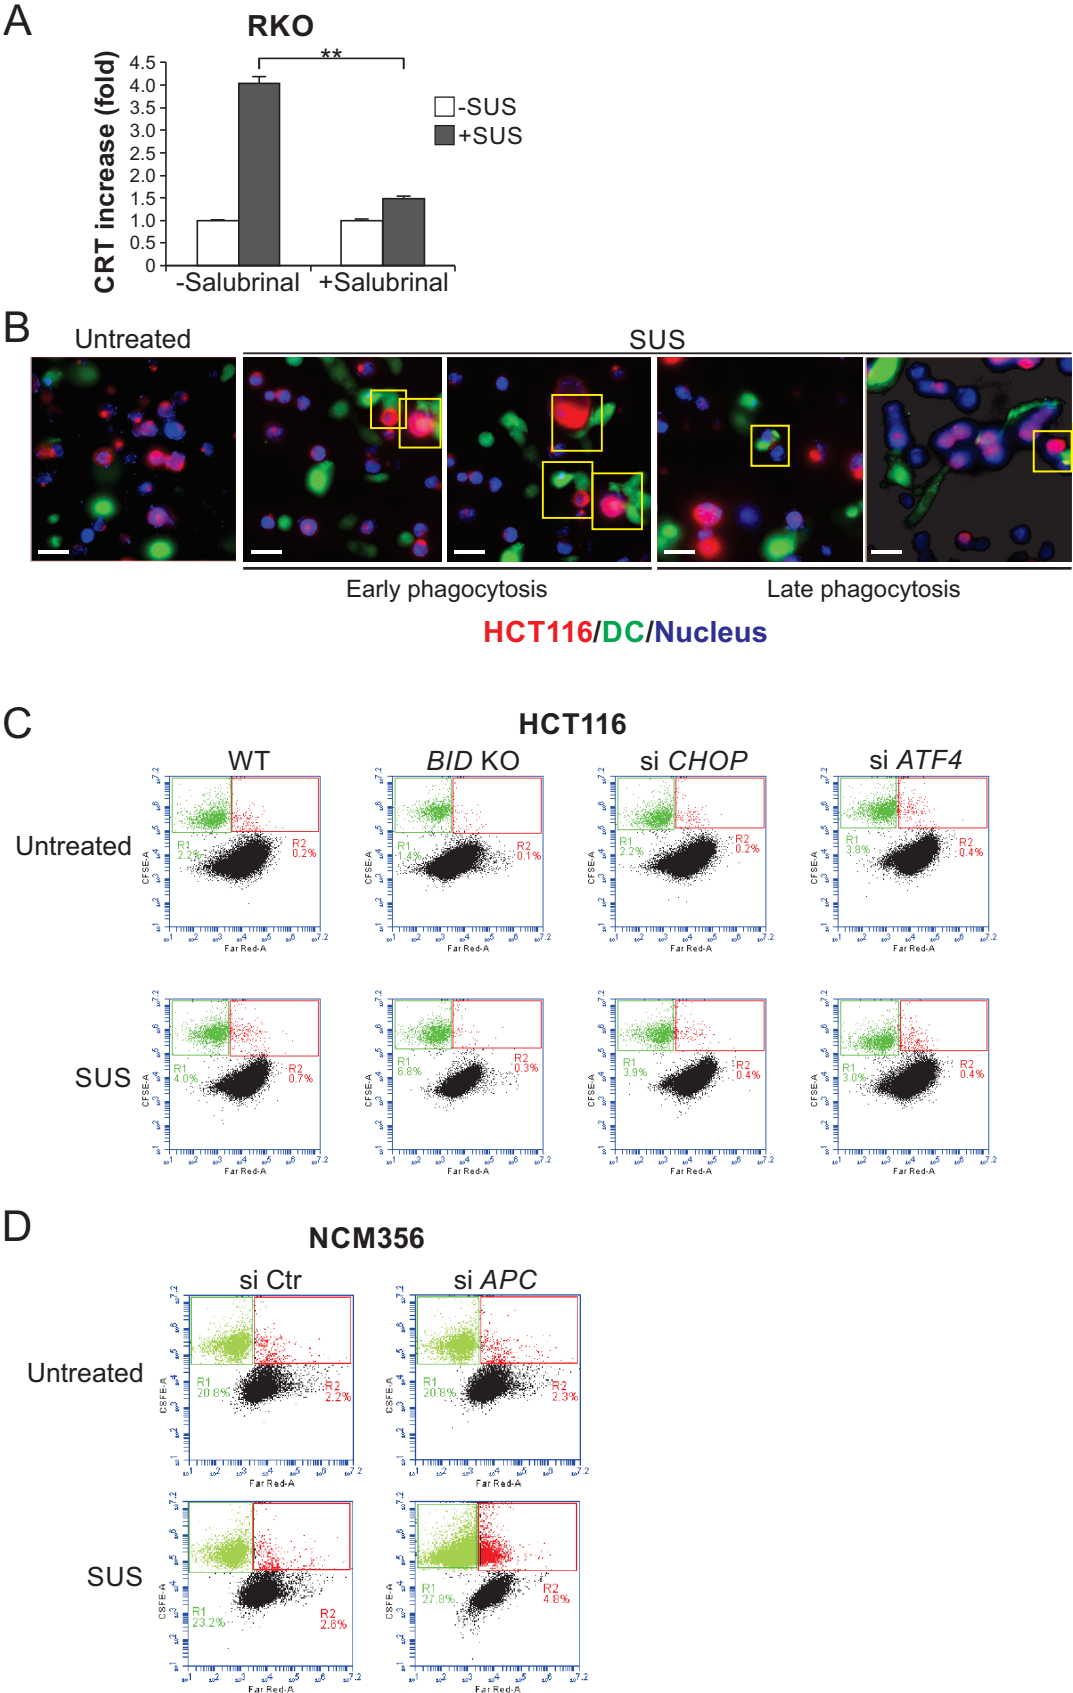

Figure S4

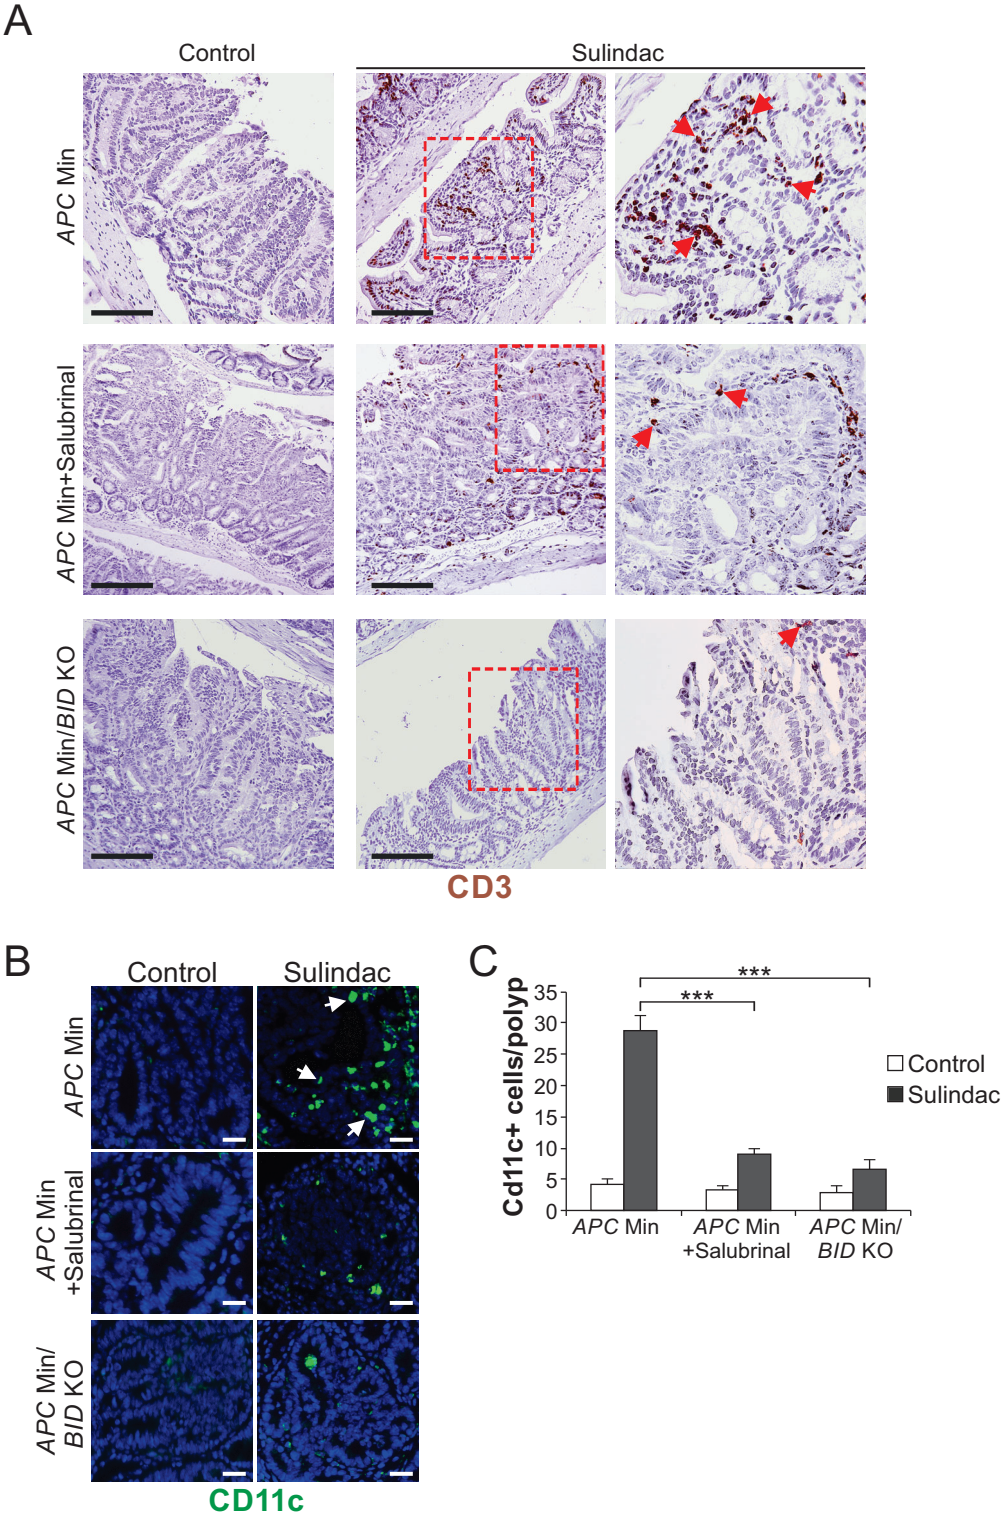



Figure S5

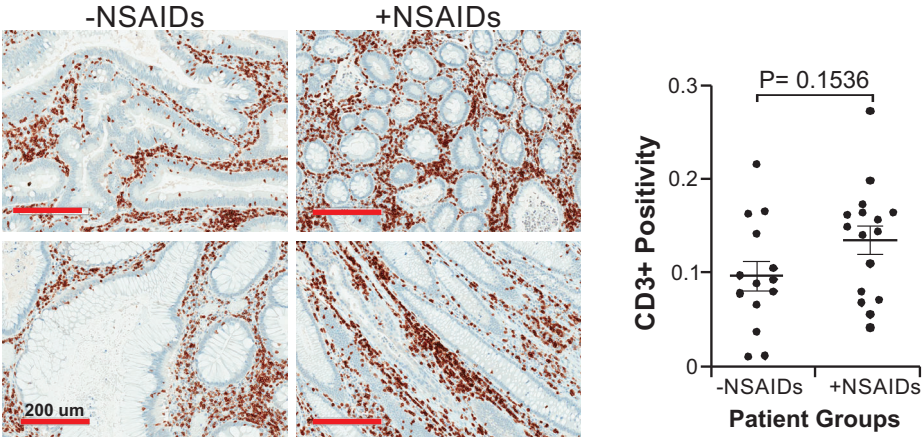



**Table S1- Key resources**

| <b>Reagent or Resource</b>                | <b>Source</b>           | <b>Identifier</b> |
|-------------------------------------------|-------------------------|-------------------|
| <b><u>Chemicals</u></b>                   |                         |                   |
| Sulindac sulfide                          | Merk                    | N/A               |
| Indomethacin                              | Sigma                   | I7378             |
| Celecoxib                                 | Sigma                   | Z0008             |
| Acetaminophen                             | Sigma                   | A7085             |
| Metformin                                 | Cayman Chemical Company | 13118             |
| Naproxen sodium                           | Apex Bio                | B5984             |
| Diclofenac (sodium salt)                  | Cayman Chemical Company | 70680             |
| Sodium salicylate                         | Sigma                   | S3007             |
| Salubrinal                                | Apex Bio                | B2025             |
| DMSO                                      | Sigma                   | D2650-5X 10ML     |
| <b><u>Antibodies</u></b>                  |                         |                   |
| <b>Western Blotting</b>                   |                         |                   |
| Rabbit polyclonal, Anti-cleaved caspase 3 | Cell Signaling          | #9661             |
| Rabbit polyclonal, Death receptor 5       | Abcam                   | #ab8416           |
| Rabbit polyclonal, CREB-2 (ATF4)          | Santa Cruz              | #sc-200           |
| Rabbit polyclonal, pEIF2 $\alpha$         | Cell Signaling          | #3398             |
| Rabbit polyclonal, EIF2 $\alpha$          | Santa Cruz              | #sc-11386         |
| Rabbit polyclonal, PERK                   | Cell Signaling          | #5683P            |
| Rabbit polyclonal, pPERK                  | Santa Cruz              | #sc-32577         |
| Rabbit polyclonal, Bid                    | Cell Signaling          | #2002             |
| Rabbit monoclonal, PDI                    | Cell Signaling          | #3501P            |
| Rabbit monoclonal, IRE1a                  | Cell Signaling          | #3294P            |
| Mouse monoclonal, $\beta$ -Actin          | Sigma                   | #A5441            |
| Mouse monoclonal, CHOP                    | Cell Signaling          | #2895s            |
| Mouse monoclonal, APC                     | Calbiochem              | #OP44             |
| Mouse monoclonal, C-Myc                   | Santa Cruz              | #sc-40            |
| Goat polyclonal, caspase-8 p18            | Santa Cruz              | sc-6136           |
| <b>IHC/IF</b>                             |                         |                   |
| Rat monoclonal, CD8                       | eBioscience             | #14-0195-82       |
| Rabbit monoclonal, CD3                    | Novus Biologicals       | #NB600-1441       |
| Rabbit polyclonal, active caspase 8       | Novus Biologicals       | #NB100-56116      |
| Mouse monoclonal, CHOP                    | ThermoFisher            | #MA1-250          |
| Rabbit polyclonal, BiP                    | Abcam                   | ab21685           |
| Rabbit polyclonal, BiP                    | Abcam                   | ab21685           |
| Rabbit polyclonal, CD69                   | Abcam                   | ab202909          |
| Rabbit monoclonal, CD11c                  | Cell Signaling          | 97585             |
| Rat monoclonal, MHCII                     | Abcam                   | ab25333           |

|                                                       |                                              |               |
|-------------------------------------------------------|----------------------------------------------|---------------|
| Goat anti-rabbit secondary antibodies, AlexaFluor 594 | Invitrogen                                   | A11012        |
| Goat anti-mouse secondary antibodies, AlexaFluor 488  | Invitrogen                                   | A11001        |
| Biotinylated goat anti-rabbit                         | Pierce                                       | #31822        |
| Biotinylated goat anti-rat                            | Pierce                                       | #31830        |
| <b>Flow Cytometry</b>                                 |                                              |               |
| Rabbit polyclonal, CRT                                | Abcam                                        | ab2907        |
| Goat anti-rabbit secondary antibodies, AlexaFluor 488 | Invitrogen                                   | A11008        |
| Rabbit Ig                                             | Jackson ImmunoResearch Laboratories          | 011-000-002   |
| APC anti-human CD14                                   | Biolegend                                    | 367117        |
| FITC anti-human CD86                                  | Biolegend                                    | 374203        |
| PE anti-human HLA-DR                                  | Biolegend                                    | 327007        |
| PE/Cyanine7 anti-human CD83                           | Biolegend                                    | 305325        |
| <b><u>DC Preparation and Phagocytosis</u></b>         |                                              |               |
| Healthy human buffy coats                             | Central Blood Bank, Pittsburgh, PA or BioIVT | N/A           |
| Human CD14 MicroBeads                                 | Miltenyi Biotec                              | 130-050-201   |
| Cell Trace Far Red Cell Proliferation Kit             | ThermoFisher                                 | C34564        |
| CellVue Claret Far Red Kit                            | Sigma                                        | MINCLARET-1KT |
| AIM V medium (Gibco)                                  | ThermoFisher                                 | 12055091      |
| Recombinant Human IL-4                                | PeproTech                                    | 200-04        |
| Recombinant Human GM-CSF                              | PeproTech                                    | 300-03        |
| <b><u>Critical Commercial Assays</u></b>              |                                              |               |
| Mini RNA Isolation II Kit                             | ZYMO Research                                | R1055         |
| ABC Kit                                               | Vector Laboratories                          | PK-6100       |
| DAB                                                   | Vector Laboratories                          | SK-4100       |
| VectaShield + DAPI                                    | Vector Laboratories                          | H-1500        |
| <b><u>Experimental Models</u></b>                     |                                              |               |
| <b>Cell Lines and Reagents</b>                        |                                              |               |
| HCT116, HT29 and RKO                                  | American Type Culture Collection             | N/A           |
| McCoy's 5A medium (Gibco)                             | ThermoFisher                                 | 16600082      |
| NCM356                                                | INCELL                                       | N/A           |
| M3 media                                              | INCELL                                       | M300A-500     |
| <b>Animal Models and Diet</b>                         |                                              |               |
| <i>APC</i> <sup>Min/+</sup> mice                      | Jackson Laboratory                           | 002020        |
| <i>C57BL6J BID</i> <sup>-/-</sup> ( <i>BID</i> KO)    | Jackson Laboratory                           | 8887          |
| AIN-93G diets                                         | Dyets Inc                                    | N/A           |
| AIN-93G diets- 200 ppm sulindac                       | Dyets Inc                                    | N/A           |

**Table S2-Details for siRNA**

| <b>siRNA</b>     | <b>Sequence /Catalogue number</b> | <b>Vendor</b> |
|------------------|-----------------------------------|---------------|
| <i>APC</i> -157  | 5'-GGAAGUAUUGAAGAUGAAG-3'         | Dharmacon     |
| <i>APC</i> -8993 | 5'-GCUGUGAAAUUCACAGUAAUA-3'       | Dharmacon     |
| <i>CHOP</i>      | 5'GCACAGCUAGCUGAAGAGA-3'          | Dharmacon     |
| <i>ATF4</i> -89  | 5'-GCCUAGGU UCUUAGAUGA-3'         | Dharmacon     |
| <i>PERK</i>      | sc-36213                          | Santa Cruz    |

**Table S3- PCR primers**

| <b>Human Primers</b>   | <b>Sequence</b>                   |
|------------------------|-----------------------------------|
| <i>DR5</i> Forward     | 5'-AAGACCCTTGTGCTCGTTGT-3'        |
| <i>DR5</i> Reverse     | 5'AGGTGGACACAATCCCTCTG-3'         |
| <i>CHOP</i> Forward    | 5'-GGTCCTGTCTTCAGATGAAAATG-3'     |
| <i>CHOP</i> Reverse    | 5'-CAGCCAAGCCAGAGAAGCA-3'         |
| <i>BiP</i> Forward     | 5'-CCAAGAGAGGGTTCTTGAATCTCG-3'    |
| <i>BiP</i> Reverse     | 5'-ATGGGCCAGCCTGGATATACAACA-3'    |
| <i>APC</i> Forward     | 5'-GGAAGCAGAGAAAGTACTGGA-3'       |
| <i>APC</i> Reverse     | 5'-CTGAAGTTGAGCGTAATACCA-3'       |
| <i>ATF4</i> Forward    | 5'-GTTCTCCAGCGACAAGGCTA-3         |
| <i>ATF4</i> Reverse    | 5'-GTGTCATCCAACGTGGTCAG-3         |
| <i>β-Actin</i> Forward | 5'-GACATTAAGGAGAAGCTGTGCTATGTT-3' |
| <i>β-Actin</i> Reverse | 5'-GCCTAGAAGCATTGCGGTGGACGA-3'    |
